# Supplementary material for: The Neurophysiology of Language Processing Shapes the Evolution of Grammar: Evidence from Case Marking
Source: PubMed Central journal article supplement (PMC4534460; doi:10.1371/journal.pone.0132819), 2015-08-12
Supplement: pone.0132819.s004.pdf [file pone.0132819.s004.pdf]

**S1 Table. Additional sample set of materials from the electrophysiological experiment on Hindi: masculine P-arguments and feminine A-Arguments**

| Condition | Examples                                                                                                                                                           |
|-----------|--------------------------------------------------------------------------------------------------------------------------------------------------------------------|
| AI        | <p><i>pānī</i>                      <i>pī-tī</i>      <i>hai</i>   <i>Anitā</i><br/> water(M)[NOM] drink-I.F AUX Anita(F)[NOM]<br/> ‘Anita drinks water.’</p>      |
| UI        | <p><i>pānī-ko</i>                  <i>pī-tī</i>      <i>hai</i>   <i>Anitā</i><br/> water(M)-ACC drink-I.F AUX Anita(F)[NOM]<br/> ‘Anita drinks water.’</p>        |
| AP        | <p><i>pānī</i>                      <i>pī-yā</i>      <i>hai</i>   <i>Anitā-ne</i><br/> water(M)[NOM] drink-P.M AUX Anita(F)-ERG<br/> ‘Anita has drunk water.’</p> |
| UP        | <p><i>pānī-ko</i>                  <i>pī-yā</i>      <i>hai</i>   <i>Anitā-ne</i><br/> water(M)-ACC drink-P.M AUX Anita(F)-ERG<br/> ‘Anita has drunk water.’</p>   |

*Condition codes:* A, ambiguous; U, unambiguous; I, imperfective aspect (not triggering ergative marking); P, perfective (triggering ergative marking). *Glosses:* AUX, auxiliary; ACC, accusative; ERG, ergative; F, feminine; M, masculine; NOM, nominative.
