# Supplementary material for: The Neurophysiology of Language Processing Shapes the Evolution of Grammar: Evidence from Case Marking
Source: PubMed Central journal article supplement (PMC4534460; doi:10.1371/journal.pone.0132819), 2015-08-12
Supplement: pone.0132819.s005.pdf [file pone.0132819.s005.pdf]

**S2 Table. Laplace bias estimates  $Pr(\text{bias in any direction})$  in large families ( $N \geq 5$ ) across methods and taxonomies.**

|                      | AUTOTYP           |                   | GLOTTOLOG         |                   |
|----------------------|-------------------|-------------------|-------------------|-------------------|
|                      | Binom./MCMC       | ML                | Binom./MCMC       | ML                |
| Africa               | 0.93 (0.75, 1)    | 0.93 (0.75, 1)    | 0.91 (0.69, 1)    | 0.91 (0.69, 1)    |
| Eurasia              | 0.75 (0.48, 0.94) | 0.75 (0.48, 0.94) | 0.77 (0.52, 0.95) | 0.77 (0.52, 0.95) |
| Pacific              | 0.5 (0.27, 0.73)  | 0.38 (0.16, 0.62) | 0.64 (0.35, 0.88) | 0.64 (0.35, 0.88) |
| South America        | 0.5 (0.15, 0.85)  | 0.5 (0.15, 0.85)  | 0.5 (0.15, 0.85)  | 0.5 (0.15, 0.85)  |
| Rest of the Americas | 0.88 (0.59, 1)    | 0.88 (0.59, 1)    | 0.88 (0.59, 1)    | 0.88 (0.59, 1)    |

95% credibility intervals in brackets.
