# Supplementary material for: The Neurophysiology of Language Processing Shapes the Evolution of Grammar: Evidence from Case Marking
Source: PubMed Central journal article supplement (PMC4534460; doi:10.1371/journal.pone.0132819), 2015-08-12
Supplement: pone.0132819.s006.pdf [file pone.0132819.s006.pdf]

**S3 Table. Estimated probability  $Pr(\text{deviation})$  in small families.**

|                      | AUTOTYP     |      | GLOTTOLOG   |      |
|----------------------|-------------|------|-------------|------|
|                      | Binom./MCMC | ML   | Binom./MCMC | ML   |
| Africa               | 0.00        | 0.00 | 0.00        | 0.00 |
| Eurasia              | 0.03        | 0.03 | 0.03        | 0.03 |
| Pacific              | 0.03        | 0.00 | 0.07        | 0.06 |
| South America        | 0.00        | 0.00 | 0.00        | 0.00 |
| Rest of the Americas | 0.00        | 0.00 | 0.00        | 0.00 |

$Pr(\text{deviation})$  is the probability that the sole survivor(s) of a larger unknown family that is sampled with  $Pr(\text{bias})$  as exhibiting a bias is in fact not representative of the direction of that bias, i.e. exhibits a structure that deviates from the bias that characterized the larger family.
