# Supplementary material for: The Neurophysiology of Language Processing Shapes the Evolution of Grammar: Evidence from Case Marking
Source: PubMed Central journal article supplement (PMC4534460; doi:10.1371/journal.pone.0132819), 2015-08-12
Supplement: pone.0132819.s007.pdf [file pone.0132819.s007.pdf]

**S4 Table. Comparison of bias estimates across methods in large families with variation (i.e. not all ergative or all non-ergative), using AUTOTYP taxonomies**

|                   | majority value | majority proportion | Set-based                |                      | Tree-based           |                      |             |        |
|-------------------|----------------|---------------------|--------------------------|----------------------|----------------------|----------------------|-------------|--------|
|                   |                |                     | $P_{\text{Binom. test}}$ | $P_{\text{LR test}}$ | ML                   | ML                   | ML          | MCMC   |
|                   |                |                     |                          |                      | fitDiscrete          | BayesTraits          | BayesTraits | log BF |
|                   |                |                     |                          |                      | $P_{\text{LR test}}$ | $P_{\text{LR test}}$ |             |        |
| Oceanic           | A              | 0.889               | 0.001                    | 0.311                | 0.120                | 0.120                | 8.202       |        |
| Cariban           | none           | NA                  | 0.500                    | 0.705                | 0.705                | 0.705                | -0.972      |        |
| Chimbu-Wahgi      | none           | NA                  | 0.145                    | 0.434                | 0.192                | 0.192                | 0.521       |        |
| Eastern Highlands | none           | NA                  | 0.363                    | 0.259                | 0.482                | 0.482                | -0.502      |        |
| Finisterre-Huon   | none           | NA                  | 0.773                    | 0.705                | 0.705                | 0.705                | -0.563      |        |
| Binanderean       | none           | NA                  | 0.500                    | 0.654                | 0.654                | 0.654                | -0.625      |        |
| Gunwingguan       | none           | NA                  | 0.656                    | 1.000                | 1.000                | 1.000                | -0.947      |        |
| Indo-European     | A              | 0.770               | 0.000                    | 0.000                | 0.000                | 0.000                | 19.098      |        |
| Koian             | none           | NA                  | 0.109                    | 0.547                | 0.198                | 0.198                | 0.685       |        |
| Madang            | A              | 0.875               | 0.035                    | 0.330                | 0.212                | 0.212                | 2.475       |        |
| Nakh-Daghestanian | none           | NA                  | 0.868                    | 0.369                | 0.369                | 0.369                | -0.593      |        |
| Pama-Nyungan      | none           | NA                  | 0.734                    | 0.617                | 0.617                | 0.617                | -1.149      |        |
| Pano-Tacanan      | none           | NA                  | 0.891                    | 0.410                | 0.410                | 0.410                | -0.496      |        |
| Sino-Tibetan      | none           | NA                  | 0.944                    | 0.147                | 0.147                | 0.147                | 0.525       |        |

The results from a Bayes Factor analysis of MCMC models of transitions rates agree with the results from a simple binomial tests. The only divergences in the results is found with ML models in the case of the Oceanic and Madang families.
