# Supplementary material for: The Neurophysiology of Language Processing Shapes the Evolution of Grammar: Evidence from Case Marking
Source: PubMed Central journal article supplement (PMC4534460; doi:10.1371/journal.pone.0132819), 2015-08-12
Supplement: pone.0132819.s008.pdf [file pone.0132819.s008.pdf]

S5 Table. Comparison of bias estimates across methods in large families with variation (i.e. not all ergative or all non-ergative), using GLOTTOLOG taxonomies

|                          | majority value | majority proportion | Set-based                |             | Tree-based           |             |                      |             |
|--------------------------|----------------|---------------------|--------------------------|-------------|----------------------|-------------|----------------------|-------------|
|                          |                |                     | $P_{\text{Binom. test}}$ | ML          |                      | MCMC        |                      |             |
|                          |                |                     |                          | fitDiscrete | $P_{\text{LR test}}$ | BayesTraits | $P_{\text{LR test}}$ | BayesTraits |
| CE Malayo-Polynesian     | A              | 0.900               | 0.000                    | 0.181       | 0.076                | 10.836      |                      |             |
| Cariban                  | none           | NA                  | 0.500                    | 0.705       | 0.705                | -0.718      |                      |             |
| Gunwinyguan              | none           | NA                  | 0.656                    | 1.000       | 1.000                | -0.875      |                      |             |
| Indo-European            | A              | 0.773               | 0.000                    | 0.000       | 0.000                | 21.374      |                      |             |
| Koiarian                 | none           | NA                  | 0.109                    | 0.418       | 0.164                | 0.917       |                      |             |
| Nakh-Daghestanian        | none           | NA                  | 0.868                    | 0.369       | 0.369                | -0.422      |                      |             |
| Nuclear Trans New Guinea | A              | 0.682               | 0.011                    | 0.028       | 0.029                | 3.570       |                      |             |
| Pama-Nyungan             | none           | NA                  | 0.734                    | 0.617       | 0.617                | -1.524      |                      |             |
| Panoan                   | none           | NA                  | 0.813                    | 0.654       | 0.654                | -0.579      |                      |             |
| Sino-Tibetan             | none           | NA                  | 0.944                    | 0.147       | 0.147                | 0.141       |                      |             |

The results from a Bayes Factor analysis of MCMC models of transitions rates agree with the results from a simple binomial tests. The only divergence in the results is found with ML models in the case of the Central-Eastern Malayo-Polynesian families.
